# Supplementary material for: Super RLuc8-sFv; a new luciferase-labeled probe for detection of human CD4+ cells
Source: Royal Society of Chemistry journal article supplement (doi:10.1039/c6mb00652c), 2017-01-23
Supplement: c6mb00652c1.pdf [file c6mb00652c1.pdf]

## Supplementary data

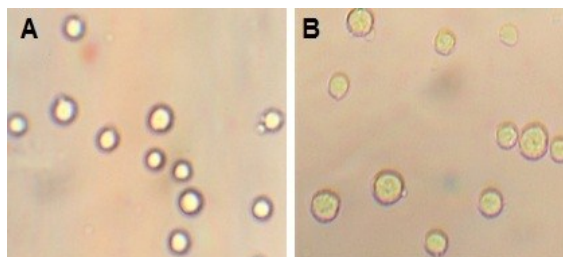

Supplementary Fig. 1 microscopic analysis of A) PBMC and B) HeLa cell suspensions. 400 times magnification.

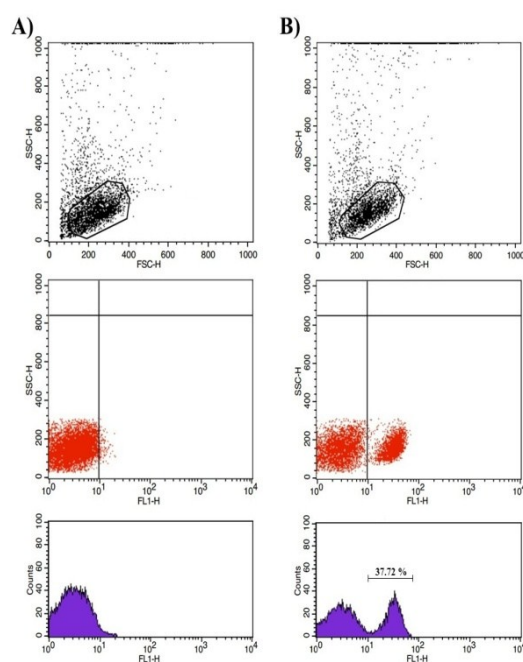

Supplementary Fig. 2 Dot plots, gating strategies and fluorescence histograms of A) Non-treated PBMCs and B) PBMCs treated with FITC-labeled anti-Human CD4 IgG. Excitation at 488 nm by an argon laser (20 mW). 37.72 % of the gated cells showed an increased fluorescence signal after treatment with the FITC-labeled antibody.

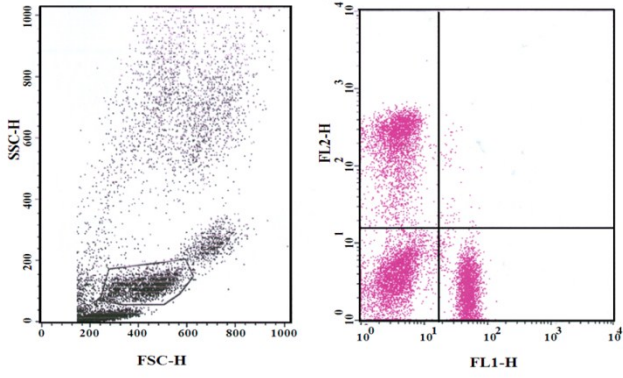

| Quad | Events | % Gated | %Total | X Mean | X Geo Mean | Y Mean | Y Geo Mean |
|------|--------|---------|--------|--------|------------|--------|------------|
| UL   | 2972   | 29.68   | 7.72   | 4.29   | 3.81       | 228.44 | 180.29     |
| UR   | 69     | 0.69    | 0.18   | 31.88  | 29.72      | 101.86 | 61.29      |
| LL   | 3494   | 34.89   | 9.07   | 4.14   | 3.49       | 4.19   | 3.45       |
| LR   | 3480   | 34.75   | 9.04   | 51.10  | 49.60      | 2.73   | 2.22       |

Supplementary Fig. 3 Flow cytometric analysis of stained CD4+ cells from healthy control subject. An acquisition gate was established based on FSC and SSC that included CD4+ cells.
